# Supplementary material for: Proteomic Analysis of Lysine Acetylation Sites in Rat Tissues Reveals Organ Specificity and Subcellular Patterns
Source: PubMed Central journal article supplement — Cell Rep. Author manuscript; Available in PMC 2014 Jul 18. (PMC4103158; doi:10.1016/j.celrep.2012.07.006), 2012-08-16
Supplement: NIHMS591251-supplement-Raw_MS_Data.pdf [file NIHMS591251-supplement-Raw_MS_Data.pdf]

## Raw MS Data

Raw mass spectrometric files in Thermo Scientific's \*.raw format (60 LC-MS/MS runs for rat tissues and 18 LC-MS/MS runs for human skeletal muscle samples) as well as annotated MS/MS spectra libraries (png-files) for acetylated peptides are available for download through Tranche at <http://proteomecommons.org>.

The **.raw files for the rat tissues** are available using the following Hash-keys and passwords:

Hash-key:

0TaUXsHICWRTFdoM8Lo0jgk7Ekj4VmYMiOrZ3cMnutxSRuM0kKSz0+1hvjm9TLsVv+ttqPrAzLpQvXop1DZSf+N/70oAAAAAAAAACpQ==

Password:

AcetylomeRawFiles\_1

Hash-key:

t0B4SMwk3NVQkaD1sjiNYBUFeFr0IYuBiruSXvdFEImST5VDzsxXB3sGyESR3QbEVO1dIrlL9CN4YfDYL4jIHYSsz0AAAAAAAAACpQ==

Password:

AcetylomeRawFiles\_2

Hash-key:

ovvfNnonNI7tThFcb/nHy80sZRE4/ut5G8HglhJpX903nIU2T5h0hQrFNF5LsHU1y7XmmolExOCTbgut2rUsYMEYkAAAAAAAAACpQ==

Password:

AcetylomeRawFiles\_3

The **.raw files for human muscle** are available using the following Hash-keys and passwords:

Hash-key:

JRPwCr4qeEHN56d0pG3/eVtVRreTxF5RCEbOJuA9uXJNe0kHquZiWzIEAx/P/L3gh8zcYmuXWJ7nvqCyNF0tYN3K4bMAAAAAAAAAACpw==

Password:

AcetylomeRawFiles\_1

Hash-key:

rsWtsVE67P2KL8jt4dxtz9SR5jkc6xoZGB9LfpvG6vRijEN0DCDCCEy2ME+kdN+mCXczirxzHLYRKGIMijcXh9eEAAAAAAAAACpw==

Password:

AcetylomeRawFiles\_2

Hash-key:

rKlsGZI3ND5pixHXyB78Xc6UDvsj40Q/tvKHCasUNj04qwhkXbImDODFcNaBvuPZfb9EwE5UDvGMQvd81hu1U3DGzCQAAAAAAAAACpw==

Password:

AcetylomeRawFiles\_3

**Annotated acetylated peptide MS/MS spectra (.png files) from rat tissues** are available using the following:

Hash-key:

RONRnnCS20U4212mlmZlwJ7TaSuT8PqyHccDRxfdDIGqhpGgXXHzsJbQVILCEeb8756S98ixgr5935HnjX  
iLBY0exMIAAAAAAADFA==

Password:

RatAcetylationMS2Spectra

**Annotated acetylated peptide MS/MS spectra (.png files) from human muscle** are available using the following:

Hash-key:

rmBAh100+XqBYwP8e7HYfy4cbl0NXwBWpmHlgB0CifV/qWRL3zhI9AL4r8n/Lpmb8MZelZsQkyy3xfyH  
1rwopVEPSnOAAAAAAAADCw==

Password:

HumanMuscleAcetylationMS2Spectra
